# Supplementary material for: Encapsulating quantum dots with amino functionalized mesoporous hollow silica microspheres for the sensitive analysis of formaldehyde in seafood
Source: Royal Society of Chemistry journal article supplement (doi:10.1039/c6ay00138f), 2016-01-01
Supplement: c6ay00138f1.pdf [file c6ay00138f1.pdf]

**Encapsulating quantum dots with amino functionalized mesoporous hollow silica microspheres for the sensitive analysis formaldehyde in seafood**

Yujuan Cao<sup>1,2\*</sup>, Wei Wu<sup>1</sup>, Jiongling Wei<sup>1</sup>, Song Wang<sup>1</sup>, Xiaogang Hu<sup>1,2</sup>, Ying Yu<sup>1,2</sup>

(1. School of Chemistry and Environment, South China Normal University,  
Guangzhou 510006, China;

2. Guangzhou Key Laboratory of Analytical Chemistry for Biomedicine, South China  
Normal University, Guangzhou 510006, China)

\* Corresponding author: Yujuan Cao

Tel. : +86-20-39310257

Fax : +86-20-39310380

E. mail : [caoyj@scnu.edu.cn](mailto:caoyj@scnu.edu.cn)

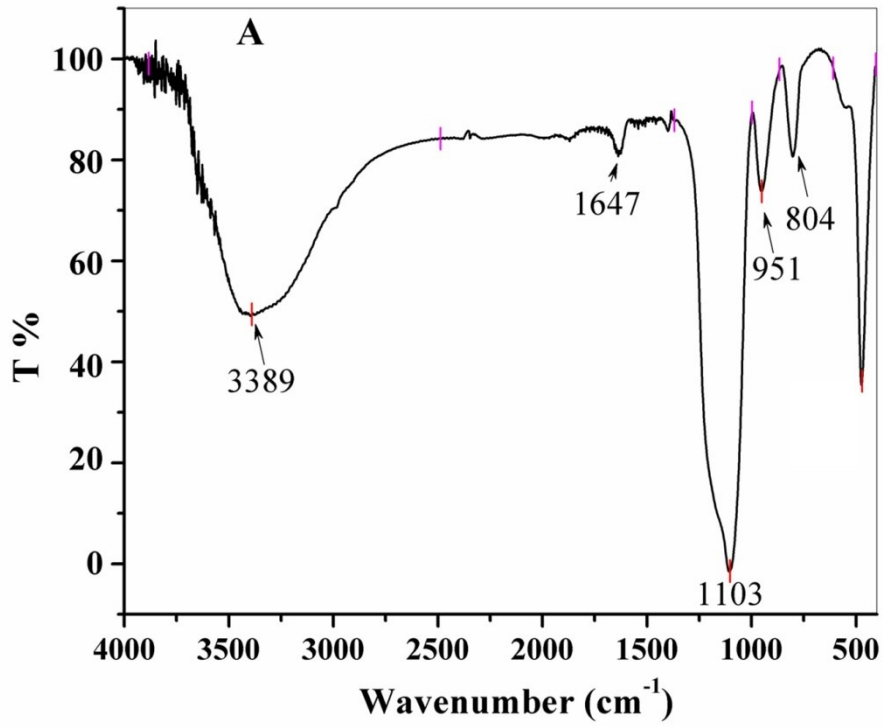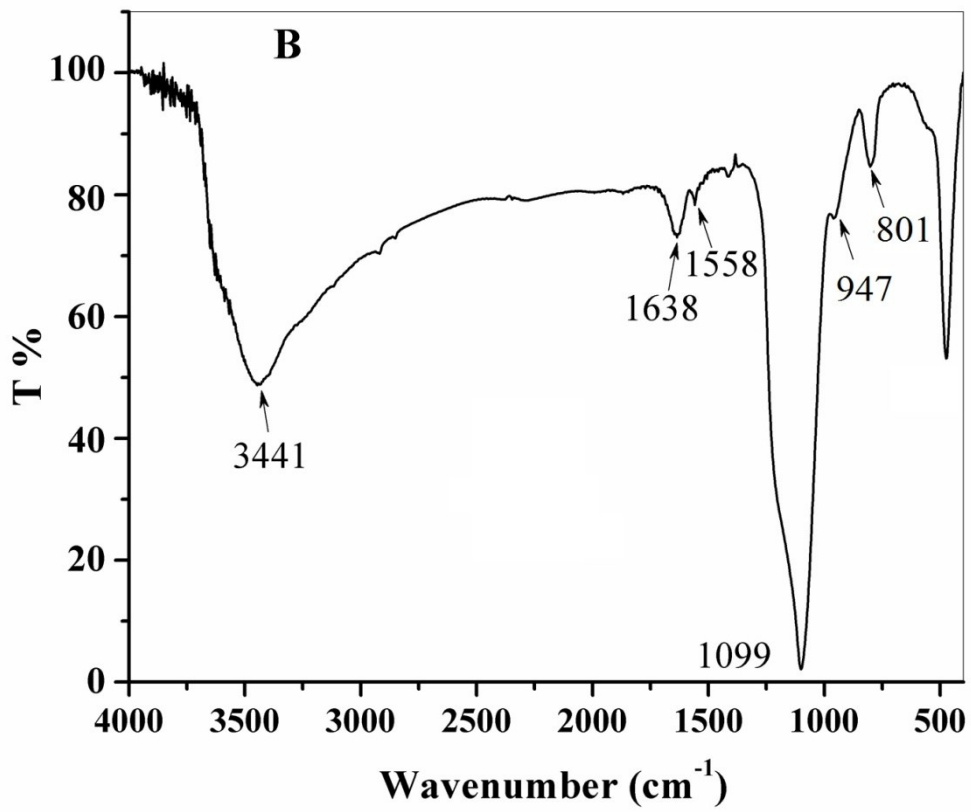

Fig.S1 FT-IR spectra of SiO<sub>2</sub> microsphere (A) and MHSM (B)

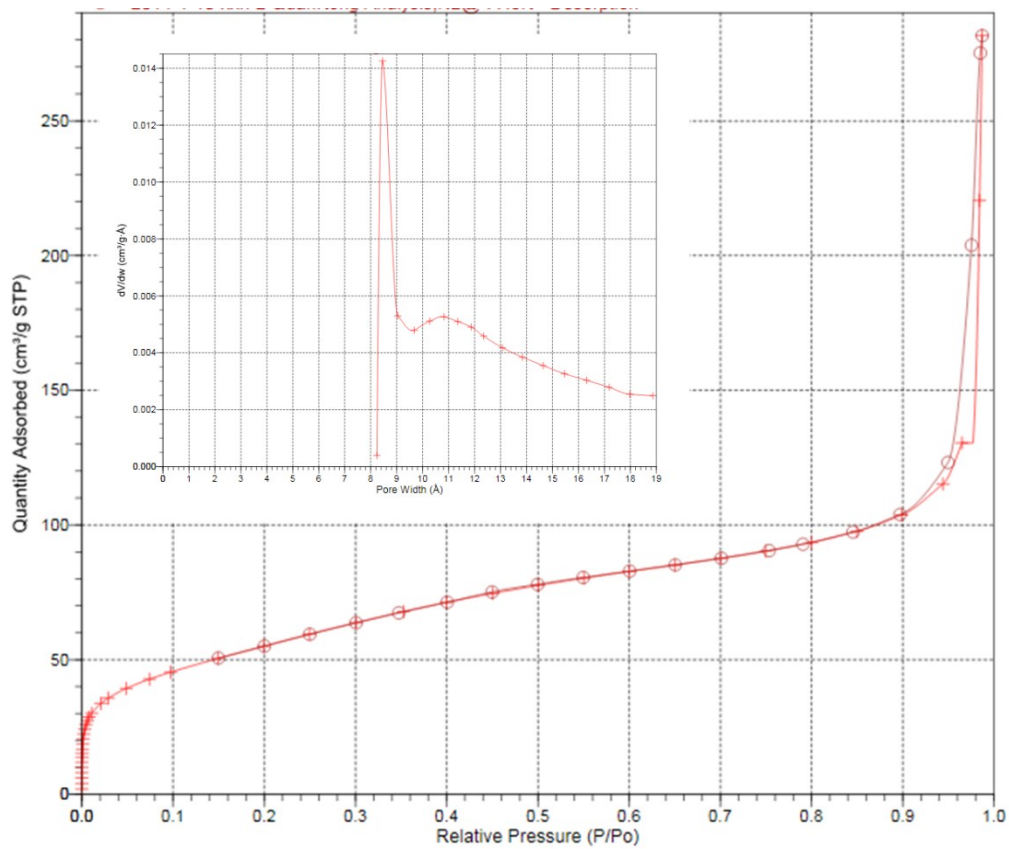

Fig.S2 N<sub>2</sub> adsorption-desorption isotherms of MHSM (Inset is the related pore diameter distribution of MHSM)

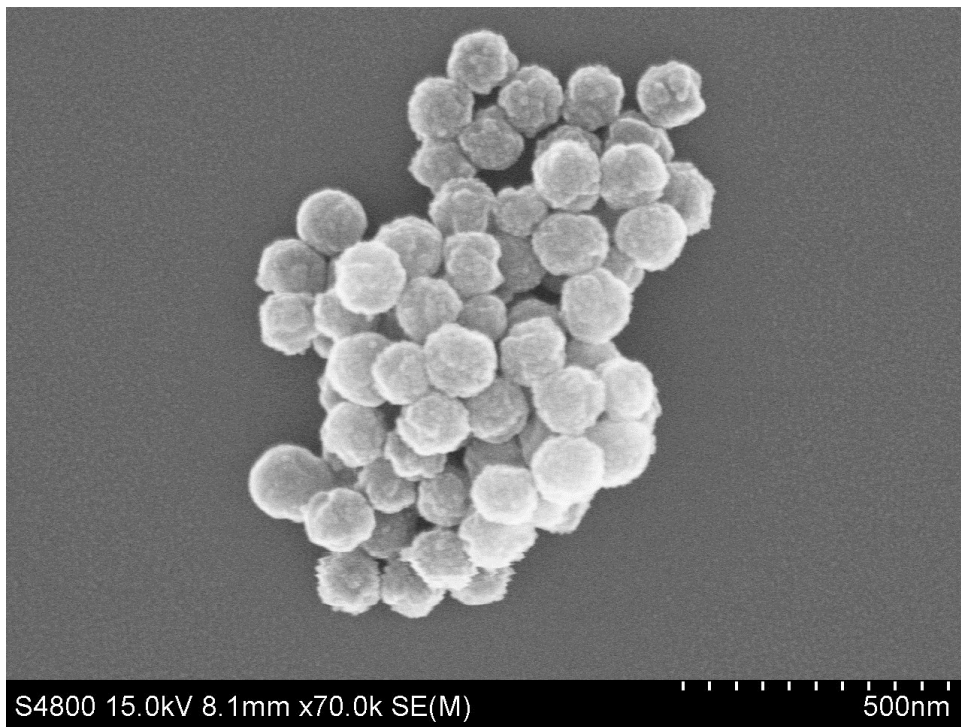

Fig.S3 SEM characterization of QD-MHSMs in real sample analysis

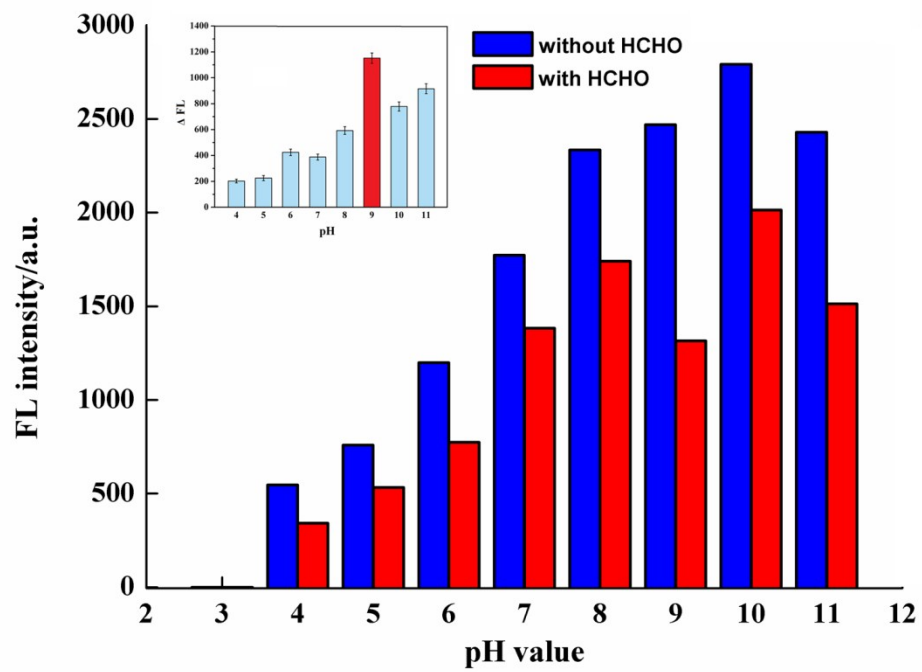

Fig.S4 FL quenching response of QDs-MHSM in the presence of 3.1 mg/L formaldehyde at different pH values

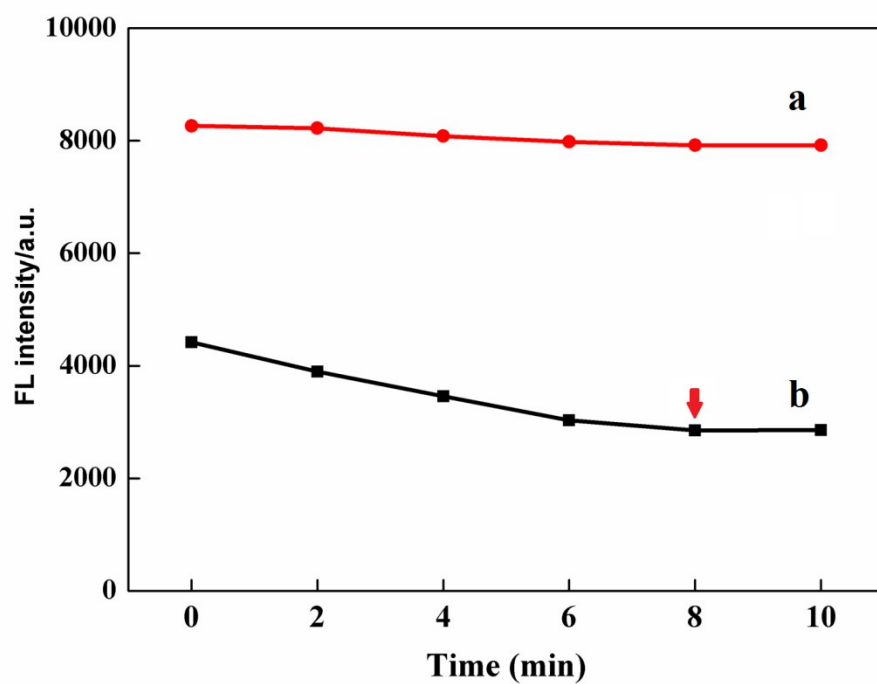

Fig.S5 Time-dependent FL response of QDs-MHSM in the absence (a) and presence (b) of 3.1 mg/L formaldehyde in pH 9 PBS buffer
